# Supplementary material for: Leg ulceration and perceived health: a population based case-control study
Source: Oxford University Press journal article supplement (doi:10.1093/ageing/afh087), 2004-04-13
Supplement: afh087_Supplementary_Data.zip [file afh087_Supplementary_Data.zip]

Archive with 1 entries (1 files):
- afh087suppdata.pdf
