# Supplementary material for: Leg ulceration and perceived health: a population based case-control study
Source: Oxford University Press journal article supplement (doi:10.1093/ageing/afh087), 2004-04-13
Supplement: afh087_Supplementary_Data.zip [file afh087_Supplementary_Data.zip › afh087suppdata.pdf]

## Supplementary Data

Appendix 1. Comparison of mean SF-36 domain scores derived from national surveys

| Country          | PF   | RP   | BP   | GH   | VT   | SF   |
|------------------|------|------|------|------|------|------|
| New Zealand [18] | 86.0 | 80.7 | 77.9 | 73.8 | 65.6 | 86.6 |
| Australia [26]   | 82.6 | 79.9 | 76.8 | 71.6 | 64.5 | 85.0 |
| Canada [27]      | 85.8 | 82.1 | 75.6 | 77.0 | 65.8 | 86.2 |
| Holland [28]     | 83.0 | 76.4 | 74.9 | 70.7 | 68.6 | 84.0 |
| UK [29]          | 81.0 | 80.0 | 77.0 | 69.0 | 63.0 | 85.0 |
| USA [16]         | 84.2 | 81.0 | 75.2 | 72.0 | 60.9 | 83.2 |

PF = physical functioning; RP = role limitations due to physical problems; BP = bodily pain; GH = general health; VT = vitality; SF = social functioning; RE = Role limitations due to emotional problems; MH = mental health.
